# Supplementary material for: Chemical Composition, Antioxidant Activity, and Sensory Characterization of Commercial Pomegranate Juices
Source: MDPI journal article supplement (doi:10.3390/antiox10091381), 2021-08-29
Supplement: s1 [file s1]

**Table S3.** Sensory attributes list with definitions used for the sensory evaluation of PJs.

|                   | Attributes                       | Definitions                                                                                                                                                                                                                                 |
|-------------------|----------------------------------|---------------------------------------------------------------------------------------------------------------------------------------------------------------------------------------------------------------------------------------------|
| Appearance        | Brick-red colour                 | Colour which might change from the brick red colour to the more or less intense brown colour.                                                                                                                                               |
|                   | Purple-red colour                | Colour which might change from red colour to more or less intense purple colour.                                                                                                                                                            |
|                   | Cloudy                           | Opalescence; difficulty to see through a transparent glass.                                                                                                                                                                                 |
| Smell             | Pomegranate fruit                | Sour, sweet and fruity aromas. These aromas remind the assessor to a combination of grape, redberry, and other berries such as blackberries, cherries, currants, raspberries. Vegetable notes like beets and carrots might be also present. |
|                   | Fresh fruit                      | General term for describing sweet, floral and fruity aromas, correlated to a just extracted fruit.                                                                                                                                          |
|                   | Tomato                           | Aroma associated to the tomato fruit.                                                                                                                                                                                                       |
|                   | Berry                            | Sweet, slightly sour aromas related to ripe berries, such as raspberries, blueberries, blackberries, currants.                                                                                                                              |
|                   | Cherry                           | Sour, fruity and slightly bitter aromas commonly related to the cherries.                                                                                                                                                                   |
|                   | Cooked apple                     | Sweet slightly fruity and floral aroma, commonly related to a processed apple juice and cooked apples.                                                                                                                                      |
|                   | Plum                             | Sweet aromas, typical of dried plum.                                                                                                                                                                                                        |
|                   | Floral                           | Sweet and perfumed perception reminding to the flowers.                                                                                                                                                                                     |
|                   | Acetic acid                      | Odour associated to the acetic acid.                                                                                                                                                                                                        |
|                   | Vegetable-herbal                 | Typical aroma of just cut grape vine and stem.                                                                                                                                                                                              |
|                   | Brown spices (star anise, clove) | Sweet, refreshing and spicy aromas associated with star anise or clove.                                                                                                                                                                     |
|                   | Wilted fruit                     | Sweet honey or caramel-like aromas commonly associated with wilted fruits, such as raisins.                                                                                                                                                 |
|                   | Candies                          | Sweet aroma often associated with processed essential oils and usually found in products such as gummy candies.                                                                                                                             |
|                   | Caramel                          | Sweet aroma that may include notes of character identified as caramel and commonly associated with honey, brown sugar, caramel or other products that have undergone non-enzymatic browning and Maillard reaction.                          |
|                   | Honey                            | Sweet, slightly spicy aroma associated with honey.                                                                                                                                                                                          |
|                   | Beet                             | Earthy and slightly sweet aromas commonly associated with canned or cooked red beets.                                                                                                                                                       |
|                   | Mushroom/Earthy                  | Aroma similar to moist soil, characteristic of cellars or similar.                                                                                                                                                                          |
|                   | Metallic                         | Flavour of a slightly oxidized metal, such as iron, copper and / or a silver teaspoon.                                                                                                                                                      |
|                   | Cooked                           | Sweet aroma associated with that of caramel and honey.                                                                                                                                                                                      |
| Texture/Mouthfeel | Effervescence                    | A feeling of an increased sensation on the tongue that may be due to intense carbonation or other causes. Evaluate during first 3–5 s after sample is placed in the mouth.                                                                  |
|                   | Tamarind                         | Aroma associated with tamarind, that is sour, very fruity and refreshing.                                                                                                                                                                   |
|                   | Alcohol                          | Intense fruity aroma similar to ethanol, aromatic associated with alcohol from fermented grape (red wine).                                                                                                                                  |
|                   | Metallic                         | A mouthfeel and aromatics associated “tin” cans, iron copper, or oxidized silver.                                                                                                                                                           |
|                   | Dryness                          | A sensation of abrasion and drying of the surface of the teeth.                                                                                                                                                                             |
|                   | Homogeneity                      | Presence of fragments found in the mouth.                                                                                                                                                                                                   |
|                   | Woody                            | Aroma associated with chopped wood.                                                                                                                                                                                                         |
|                   | Pungent                          | A sharp, physically penetrating sensation in the nasal cavity.                                                                                                                                                                              |
|                   | Astringency                      | Dry puckering mouthfeel associated with tea leaves.                                                                                                                                                                                         |
| Taste             | Sweet                            | Taste associated with a sucrose solution.                                                                                                                                                                                                   |
|                   | Sour                             | Taste associated with an acetic acid solution.                                                                                                                                                                                              |
|                   | Bitter                           | Taste associated with caffeine or quinine.                                                                                                                                                                                                  |
