# Supplementary material for: Chemical Composition, Antioxidant Activity, and Sensory Characterization of Commercial Pomegranate Juices
Source: MDPI journal article supplement (doi:10.3390/antiox10091381), 2021-08-29
Supplement: s1 [file s1]

**Table S1.** Nutritional values of the eight commercial PJs.

| <b>Samples *</b> | <b>Fats</b> | <b>Saturated fats</b> | <b>Sugars</b> | <b>Simple sugars</b> | <b>Proteins</b> | <b>Fibers</b> | <b>Salt</b> |
|------------------|-------------|-----------------------|---------------|----------------------|-----------------|---------------|-------------|
|                  | (%)         | (%)                   | (%)           | (% of sugars)        | (g)             | (g)           | (g)         |
| <b>ICPJ1</b>     | <0.5        | <0.1                  | 14            | 14                   | <0.5            | <0.5          | 0.02        |
| <b>INCPJ2</b>    | 0.0         | 0.0                   | 12.29         | 8.9                  | 0               | 0             | 0           |
| <b>SNCPJ3</b>    | 0.29        | 0.08                  | 13.3          | 13.7                 | 0.15            | 0.1           | 0.001       |
| <b>INCPJ4</b>    | 1.2         | 0.3                   | 13.7          | 12.3                 | 1.9             | 2             | <0.03       |
| <b>SCPJ5</b>     | <0.5        | <0.1                  | 12            | 12                   | <0.5            | <0.5          | <0.01       |
| <b>SCPJ6</b>     | <0.5        | <0.1                  | 11            | 9.4                  | <0.5            | <0.5          | <0.01       |
| <b>ICPJ7</b>     | <0.5        | 0.0                   | 12            | 12                   | 0               | 1.3           | 0.02        |
| <b>INCPJ8</b>    | 2.0         | 0.1                   | 16            | 16                   | 0.5             | 2.2           | 0.0175      |

\* All samples were no added sugars, acidifiers and preservatives.
