# Supplementary material for: Chemical Composition, Antioxidant Activity, and Sensory Characterization of Commercial Pomegranate Juices
Source: Antioxidants (Basel). 2021 Aug 29;10(9):1381. doi: 10.3390/antiox10091381 (PMC8471094; doi:10.3390/antiox10091381)
Supplement: Supplementary file 1 [file antioxidants-10-01381-s001.zip]

Archive with 5 entries (5 files):
- Figure S1.jpg
- Figure S2.jpg
- Table S1.pdf
- Table S2.pdf
- Table S3.pdf
